# Supplementary material for: How education and racial segregation intersect in neighborhoods with persistently low COVID-19 vaccination rates in Philadelphia
Source: Springer Nature journal article supplement (doi:10.1186/s12889-022-13414-3), 2022-05-25
Supplement: MOESM1 [file 23082418]

Supplementary Table 1, Additional File 1

Demographic Characteristics of Neighborhoods with Persistently Low COVID-19 Vaccination Rates

| Neighborhood ZIP Code | Percent without Health Insurance | Percent with any College | Percent using Public Transportation | Percent working in the Service Industry | Percent of Households with >1 person/room | Percentage of Households with Limited English Proficiency | Index of Concentration at the Extremes for Black Non-Hispanic Race | Index of Concentration at the Extremes for Income | March18 COVID-19 Vaccination Rate/10,000 Residents | April18 COVID-19 Vaccination Rate/10,000 Residents | May18 COVID-19 Vaccination Rate/10,000 Residents |
|-----------------------|----------------------------------|--------------------------|-------------------------------------|-----------------------------------------|-------------------------------------------|-----------------------------------------------------------|--------------------------------------------------------------------|---------------------------------------------------|----------------------------------------------------|----------------------------------------------------|--------------------------------------------------|
| 19120                 | 13.80%                           | 13.80%                   | 22.30%                              | 9.10%                                   | 3.60%                                     | 14.90%                                                    | -0.44                                                              | -0.23                                             | 1018                                               | 2034                                               | 2964                                             |
| 19124                 | 12.20%                           | 10.70%                   | 24.80%                              | 10.20%                                  | 3.00%                                     | 11.10%                                                    | -0.23                                                              | -0.29                                             | 979                                                | 1932                                               | 2859                                             |
| 19132                 | 8.60%                            | 9.60%                    | 43.10%                              | 9.30%                                   | 1.70%                                     | 1.20%                                                     | -0.87                                                              | -0.52                                             | 1319                                               | 2370                                               | 3281                                             |
| 19133                 | 13.20%                           | 4.50%                    | 28.70%                              | 11.20%                                  | 5.90%                                     | 25.10%                                                    | -0.31                                                              | -0.55                                             | 984                                                | 1979                                               | 2803                                             |
| 19134                 | 9.70%                            | 11.00%                   | 21.50%                              | 8.70%                                   | 6.10%                                     | 13.70%                                                    | 0.19                                                               | -0.33                                             | 1090                                               | 2023                                               | 2922                                             |
| 19135                 | 10.30%                           | 13.40%                   | 20.00%                              | 12.50%                                  | 2.40%                                     | 4.20%                                                     | 0.21                                                               | -0.15                                             | 1180                                               | 2025                                               | 2910                                             |
| 19138                 | 8.60%                            | 15.40%                   | 32.10%                              | 12.00%                                  | 1.00%                                     | 1.20%                                                     | -0.89                                                              | -0.23                                             | 1394                                               | 2350                                               | 3147                                             |
| 19139                 | 10.80%                           | 15.30%                   | 45.30%                              | 9.40%                                   | 2.30%                                     | 1.40%                                                     | -0.81                                                              | -0.41                                             | 1351                                               | 2216                                               | 3016                                             |
| 19140                 | 11.30%                           | 7.30%                    | 39.10%                              | 8.80%                                   | 3.00%                                     | 11.90%                                                    | -0.49                                                              | -0.50                                             | 1098                                               | 2257                                               | 3193                                             |
| 19141                 | 10.20%                           | 18.00%                   | 37.20%                              | 11.70%                                  | 2.50%                                     | 3.90%                                                     | -0.80                                                              | -0.31                                             | 1122                                               | 1989                                               | 2728                                             |
| 19142                 | 11.40%                           | 9.60%                    | 39.20%                              | 10.90%                                  | 3.60%                                     | 7.50%                                                     | -0.78                                                              | -0.37                                             | 949                                                | 1815                                               | 2754                                             |
| 19151                 | 8.70%                            | 24.50%                   | 34.80%                              | 6.60%                                   | 2.20%                                     | 2.60%                                                     | -0.81                                                              | -0.05                                             | 1366                                               | 2161                                               | 2831                                             |
| 19153                 | 7.70%                            | 22.00%                   | 28.20%                              | 10.40%                                  | 1.70%                                     | 4.00%                                                     | -0.61                                                              | -0.14                                             | 1458                                               | 2492                                               | 3338                                             |
