# Supplementary material for: How education and racial segregation intersect in neighborhoods with persistently low COVID-19 vaccination rates in Philadelphia
Source: Springer Nature journal article supplement (doi:10.1186/s12889-022-13414-3), 2022-05-25
Supplement: MOESM3 [file 23082418]

Supplementary Figure 2, Additional File 2.

Solution visualization for neighborhoods by zip code that did not have persistently low COVID19 vaccination rates.

| OUTCOME_PERSISTENTLYLOW | LOW_COLLEGE | HIGH_CONCENTRATED_RACIAL_PRIVILEGE | ZIPCODE |
|-------------------------|-------------|------------------------------------|---------|
| 0                       | 0           | 0                                  | 19122   |
| 0                       | 0           | 0                                  | 19152   |
| 0                       | 0           | 0                                  | 19104   |
| 0                       | 0           | 0                                  | 19145   |
| 0                       | 0           | 0                                  | 19130   |
| 0                       | 0           | 0                                  | 19123   |
| 0                       | 0           | 0                                  | 19118   |
| 0                       | 0           | 0                                  | 19129   |
| 0                       | 0           | 0                                  | 19119   |
| 0                       | 0           | 0                                  | 19146   |
| 0                       | 0           | 0                                  | 19144   |
| 0                       | 0           | 0                                  | 19126   |
| 0                       | 0           | 0                                  | 19143   |
| 0                       | 0           | 0                                  | 19150   |
| 0                       | 0           | 1                                  | 19154   |
| 0                       | 0           | 1                                  | 19114   |
| 0                       | 0           | 1                                  | 19148   |
| 0                       | 0           | 1                                  | 19115   |
| 0                       | 0           | 1                                  | 19127   |
| 0                       | 0           | 1                                  | 19147   |
| 0                       | 0           | 1                                  | 19107   |
| 0                       | 0           | 1                                  | 19125   |
| 0                       | 0           | 1                                  | 19128   |
| 0                       | 0           | 1                                  | 19102   |
| 0                       | 0           | 1                                  | 19103   |
| 0                       | 0           | 1                                  | 19106   |
| 0                       | 1           | 1                                  | 19136   |
| 0                       | 1           | 1                                  | 19137   |
| 0                       | 1           | 0                                  | 19121   |
| 1                       | 1           | 0                                  | 19124   |
| 1                       | 1           | 0                                  | 19133   |
| 1                       | 1           | 0                                  | 19134   |
| 1                       | 1           | 0                                  | 19135   |
| 1                       | 1           | 0                                  | 19142   |
| 1                       | 1           | 0                                  | 19120   |
| 1                       | 1           | 0                                  | 19140   |
| 1                       | 1           | 0                                  | 19141   |
| 1                       | 1           | 0                                  | 19139   |
| 1                       | 1           | 0                                  | 19132   |
| 1                       | 1           | 0                                  | 19138   |
| 1                       | 0           | 0                                  | 19151   |
| 1                       | 0           | 0                                  | 19153   |

Dotted red line separates cases with and without outcome; yellow highlighter indicates consistent cases; green highlighter indicates inconsistent cases.
